# Supplementary material for: Excellent performance of one-pot synthesized Fe-containing MCM-22 zeolites for the selective catalytic reduction of NOx with NH3
Source: Royal Society of Chemistry journal article supplement (doi:10.1039/d0cy00989j), 2020-01-01
Supplement: d0cy00989j1.pdf [file d0cy00989j1.pdf]

## Supporting Information

### Excellent Performance of One-pot Synthesized Fe-containing MCM-22 Zeolites for the Selective Catalytic Reduction of NO<sub>x</sub> with NH<sub>3</sub>

Jialing Chen\*, Gang Peng, Wei Zheng, Wenbo Zhang, Li Guo\*, Xiaoqing Wu\*

*Key Laboratory of Hubei Province for Coal Conversion and New Carbon Materials, School of Chemistry and Chemical Engineering, Wuhan University of Science and Technology, Heping Avenue 947, Wuhan 430081, China*

\* Corresponding authors: Tel.: +86 27 68862335. E-mail addresses: chenjialing@wust.edu.cn., guoli@wust.edu.cn., wuxiaoqing@wust.edu.cn.

As the Supporting Information of the manuscript “Excellent Performance of One-pot Synthesized Fe-containing MCM-22 Zeolites for the Selective Catalytic Reduction of NO<sub>x</sub> with NH<sub>3</sub>”, following materials are provided:

- (1) Nitrogen adsorption/desorption isotherms of Fe/MCM-22 and parent H-MCM-22 zeolites (Figure S1);
- (2) Deconvolution of the UV-vis spectra of Fe/MCM-22 zeolites prepared by different methods (Figure S2);
- (3) Deconvolution of the NH<sub>3</sub>-TPD profiles of Fe/MCM-22 and parent H-MCM-22 zeolites (Figure S3);
- (4) Py-IR spectra of Fe/MCM-22 and parent H-MCM-22 zeolites determined at different desorption temperature (Figure S4);
- (5) The acid densities of Lewis (L) and Brønsted (B) acid sites with different acid strength (Figure S5);
- (6) TEM-EDS element mapping of IM-Fe/M22 zeolite (Figure S6).

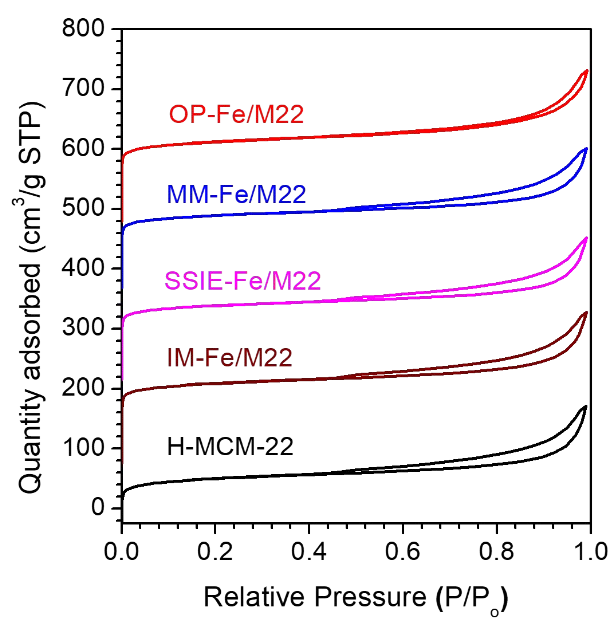

**Figure S1** Nitrogen adsorption/desorption isotherms of Fe/MCM-22 and parent H-MCM-22 zeolites

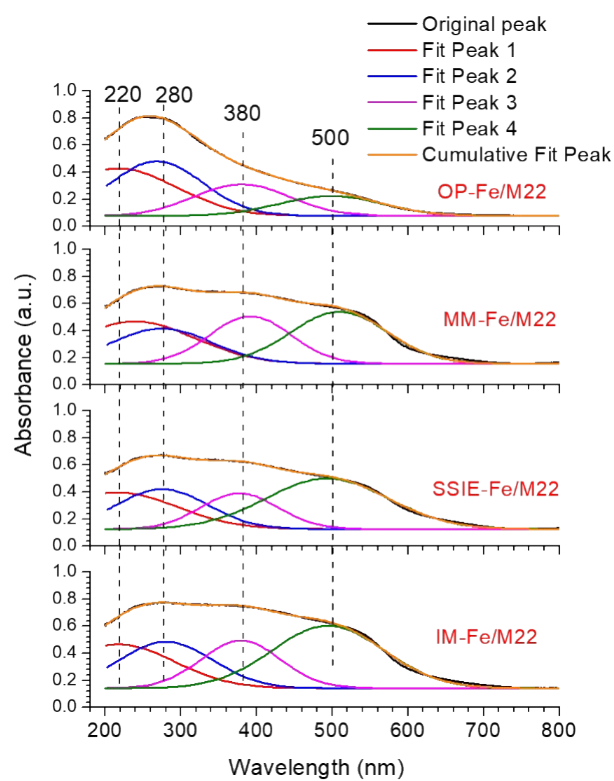

**Figure S2** Deconvolution of the UV-vis spectra of Fe/MCM-22 zeolites prepared by different methods as shown in Figure 3 (the spectra are deconvoluted by using Gaussian functions)

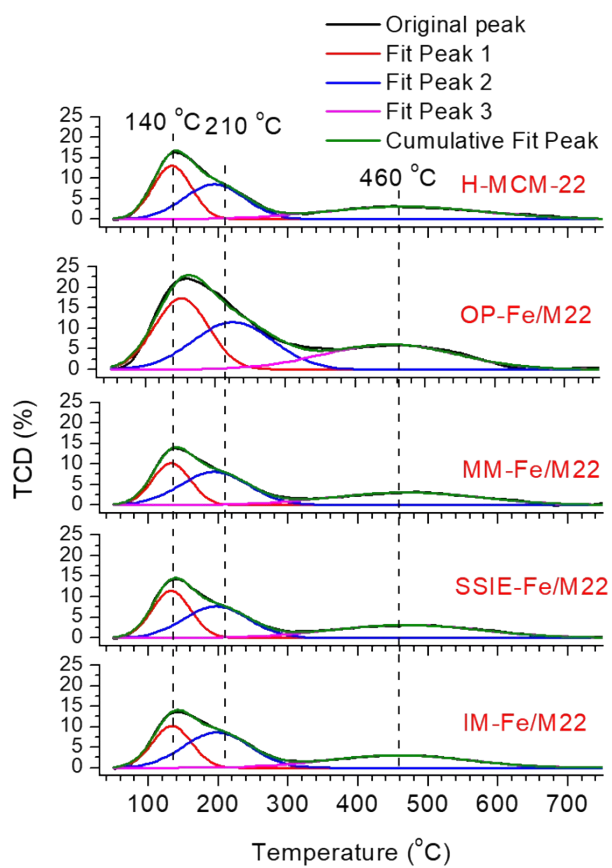

**Figure S3** Deconvolution of the  $\text{NH}_3$ -TPD profiles of Fe/MCM-22 and parent H-MCM-22 zeolites as shown in Figure 5 (the profiles are deconvoluted by using Gaussian functions)

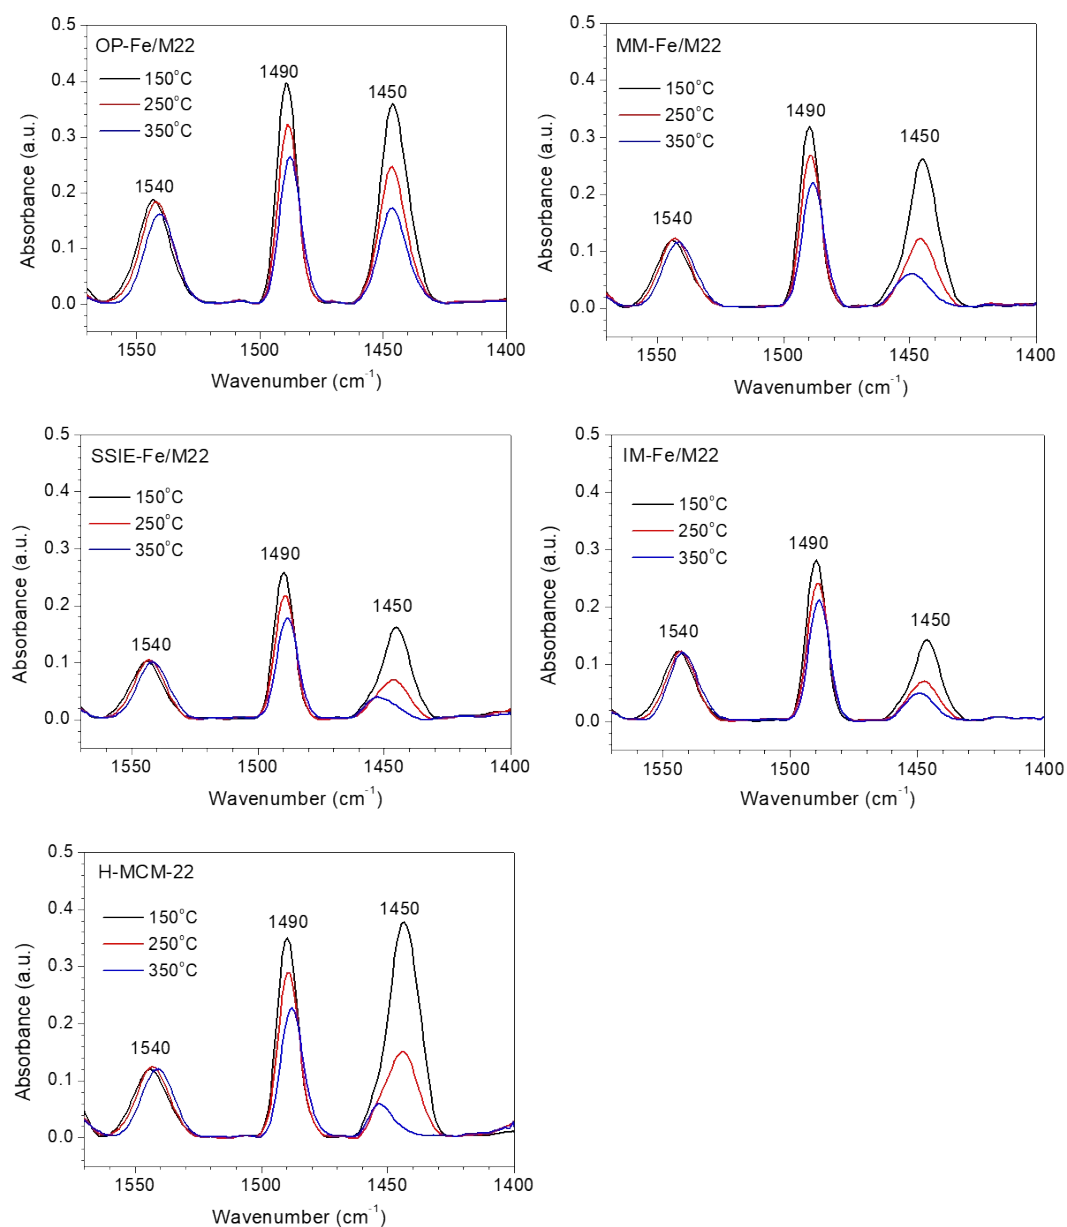

**Figure S4** Py-IR spectra of Fe/MCM-22 and parent H-MCM-22 zeolites determined at different desorption temperature (150 °C, 250 °C and 350 °C).

The Pyridine adsorption bands at 1540  $\text{cm}^{-1}$  and 1450  $\text{cm}^{-1}$  are attributed to pyridinium ions ( $\text{PyH}^+$ ) formed by pyridine adsorbed on Brønsted acid sites, and to pyridine coordinated to Lewis acid sites ( $\text{PyL}$ ), respectively. The bands at 1490  $\text{cm}^{-1}$  are contributed by both  $\text{PyH}^+$  and  $\text{PyL}$ . The bands at 1540  $\text{cm}^{-1}$  and 1450  $\text{cm}^{-1}$  are used to estimate the densities of Brønsted acid sites and Lewis acid sites, respectively, according to Madeira et al.<sup>1</sup>

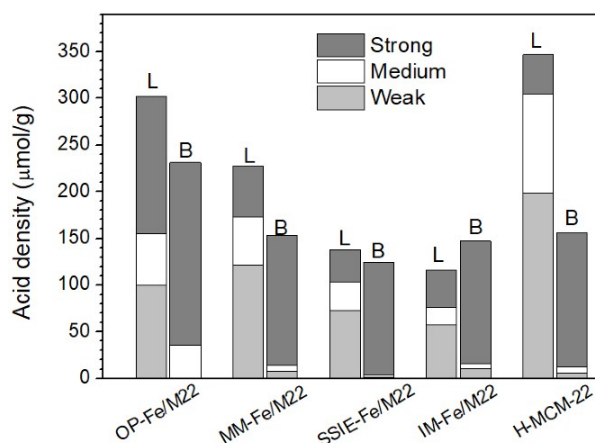

**Figure S5** The acid densities of Lewis (L) and Brønsted (B) acid sites with different acid strength (strong, medium and weak represent the strength of L or B acid sites, which were calculated from Py-IR spectra recorded at 350 °C, between 250 to 350 °C and between 150 to 250 °C, respectively, as described in section 2.2).

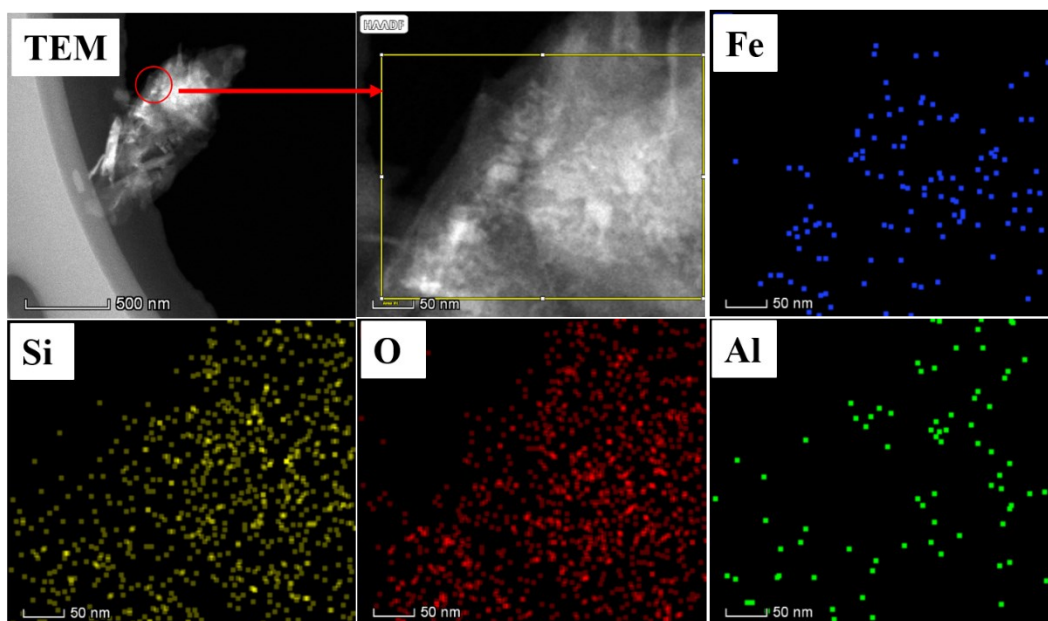

**Figure S6** TEM-EDS element mapping of IM-Fe/M22 zeolite
